# Supplementary material
Source: PubMed Central journal article supplement (PMC3568603)
Supplement: AEM.02891-12_zam999104091so1.pdf [file AEM.02891-12_zam999104091so1.pdf]

## SUPPLEMENTAL MATERIAL

For manuscript submitted to Applied Environmental Microbiology (AEM02891-12)

### A Genetic System for *Clostridium ljungdahlii*: A Chassis for Autotrophic Production of Biocommodities and a Model

#### Homoacetogen

Ching Leang<sup>#</sup>, Toshiyuki Ueki, Kelly P. Nevin and Derek R. Lovley

639 North Pleasant street, Morrill IV North, Department of Microbiology, University of Massachusetts, Amherst, MA01003.

**Table S1: List of primers/oligos used in this study.**

| Primers/Oligos   | Sequences (5'-3')                          | Descriptions                                                                                             |
|------------------|--------------------------------------------|----------------------------------------------------------------------------------------------------------|
| pCL1polylinker F | AATTCCC <del>GGG</del> GATCCGTCGACCTGCA    | Incorporate <i>EcoR</i> I- <i>Sma</i> I- <i>Bam</i> H I- <i>Sal</i> I- <i>Pst</i> I sites to pCL1        |
| pCL1polylinker R | GGTCGACGGATCCC <del>GGG</del>              | Incorporate <i>EcoR</i> I- <i>Sma</i> I- <i>Bam</i> H I- <i>Sal</i> I- <i>Pst</i> I sites to pCL1        |
| catP F           | <u>TCGAATTC</u> CCCACTAAGCGCTC             | Amplify the chloramphenicol resistance cassette ( <i>EcoR</i> I site underlined)                         |
| catP R           | TCTAAGCTTAAACAAGGCTTTGTAC                  | Amplify the chloramphenicol resistance cassette ( <i>Hind</i> III site underlined)                       |
| fliA-1           | TCTCTAGA <u>ATTGAA</u> ATAGACGTGGAC        | Amplify <i>fliA</i> upstream region of homology ( <i>Xba</i> I site underlined)                          |
| fliA-2           | <u>TCGAATTC</u> CTCCTAAGTTCATCTATC         | Amplify <i>fliA</i> upstream region of homology ( <i>EcoR</i> I site underlined)                         |
| fliA-3           | TCTAAGCTTGTCAACTTCACAGCAGAGC               | Amplify <i>fliA</i> downstream region of homology ( <i>Hind</i> III site underlined)                     |
| fliA-4           | TCTCTCGAGGTCATCCTGCTTAAATCC                | Amplify <i>fliA</i> downstream region of homology ( <i>Xho</i> I site underlined)                        |
| ermC F           | <i>TCGAATTC</i> TAGATAAAATCTCTCATATC       | Amplify the <i>ermC</i> resistance cassette from pCL1 ( <i>EcoR</i> I site italicized)                   |
| ermC R           | TCTAAGCTTCGCTCATATTTATATAG                 | Amplify the <i>ermC</i> resistance cassette from pCL1 ( <i>Hind</i> III site italicized)                 |
| adhE1-1          | TCTCTAGATGAAAGTTACAAACGTAGAAG              | Amplify <i>adhE1</i> upstream region of homology ( <i>Xba</i> I site underlined)                         |
| adhE1-2          | <u>TCGAGCTCTTAT</u> TAAGTTCTACCGATTCTACCTC | Amplify <i>adhE1</i> upstream region of homology ( <i>Sac</i> I site underlined; stop codons italicized) |
| adhE1-3          | CAAA <u>AGCTT</u> ATACAGAAGGTAC            | Amplify <i>adhE1</i> downstream region of homology (original <i>Hind</i> III site underlined)            |
| adhE1-4          | TTCTCGAGCTGCAATTCTAACCATACC                | Amplify <i>adhE1</i> downstream region of homology ( <i>Xho</i> I site underlined)                       |
| adhE2-1          | TCTCTAGACTATAGTTGATGCAGAACTTATG            | Amplify <i>adhE2</i> upstream region of homology ( <i>Xba</i> I site underlined)                         |
| adhE2-2          | <u>TCGAATTC</u> ACTTGTTCCTTGAGTATAGCTAG    | Amplify <i>adhE2</i> upstream region of homology ( <i>EcoR</i> I site underlined)                        |
| adhE2-3          | TCGGT <u>CGACGA</u> AGATATGCTAGAATAGCTGA   | Amplify <i>adhE2</i> downstream region of homology ( <i>Sal</i> I site underlined)                       |
| adhE2-4          | <u>TTCTCGAGTAA</u> ACTATCTCATGTGCCTTATAA   | Amplify <i>adhE2</i> downstream region of homology ( <i>Xho</i> I site underlined)                       |
| adhE1+E2-1       | TACGTTCTAGAATTAGAAAG                       | Amplify <i>adhE1</i> upstream region of homology (original <i>Xba</i> I site underlined)                 |
| adhE1+E2-2       | TGGAATTCATCCACTTGTTCCTTGAGTATATG           | Amplify <i>adhE1</i> upstream region of homology ( <i>EcoR</i> I site underlined)                        |
| ermC-adhE-F      | TATGAGCTCAAAGAGGGTTATAATGAACGAG            | Amplify <i>ermC</i> coding region from pCL1 ( <i>Sac</i> I site italicized)                              |
| ermC-adhE-R      | TCTAAGCTTCGCTCATATTTATATAG                 | Amplify <i>ermC</i> coding region from pCL1 ( <i>Hind</i> III site italicized)                           |
| adhE1-F          | ACCATATGAAAGTTACAAACGTAGAAG                | Amplify <i>adhE1</i> coding region ( <i>Nde</i> I site italicized)                                       |
| adhE1-R          | ATGGATCCAATTACTTTTCTTCATCTTCTAC            | Amplify <i>adhE1</i> coding region ( <i>Bam</i> H I site italicized)                                     |
